# Supplementary material for: A predictive journey towards trans-thioamides/amides
Source: Royal Society of Chemistry journal article supplement (doi:10.1039/d2cc04228b), 2022-01-01
Supplement: d2cc04228b1.pdf [file d2cc04228b1.pdf]

## Supplementary Information

### A Predictive Journey Towards *trans*-Thioamides/Amides

Michele Tomasini,<sup>a,b</sup> Jin Zhang,<sup>c</sup> Hui Zhao,<sup>c</sup> Emili Besalú,<sup>a</sup> Laura Falivene,<sup>b</sup> Lucia Caporaso,<sup>b</sup> Michal Szostak<sup>\*d</sup>  
and Albert Poater<sup>\*a</sup>

---

<sup>a</sup> *Institut de Química Computacional i Catàlisi and Departament de Química, Universitat de Girona, C/ Maria Aurèlia Capmany 69, 17003 Girona, Catalonia, Spain.*

<sup>b</sup> *Dipartimento di Chimica e Biologia, Università di Salerno, Via Ponte don Melillo, 84084, Fisciano, Italy.*

<sup>c</sup> *College of Chemistry and Chemical Engineering, Key Laboratory of Chemical Additives for China National Light Industry, Shaanxi University of Science and Technology, 6 Xuefu Road, Xi'an 710021, China.*

<sup>d</sup> *Department of Chemistry, Rutgers University, 73 Warren Street, Newark, NJ 07102, United States.*

|                                                      |    |
|------------------------------------------------------|----|
| <b>Table of Contents</b>                             | S1 |
| 1. General Information                               | S2 |
| 2. Experimental Procedures and Characterization Data | S3 |
| 3. Crystallographic Studies                          | S4 |
| 4. <sup>1</sup> H and <sup>13</sup> C NMR Spectra    | S7 |
| 5. Computational data                                | S8 |

## 1. General Information

Commercially available chemicals were purchased from commercial suppliers and used as received, except when noted, without further purification. All reactions were performed in oven-dried or flame-dried glassware. TLC analysis was carried out on glass plates coated with silica gel 60 F254. The plates were visualized using a 254 nm ultraviolet lamp. Purification of products was performed by chromatography using silica gel (200-300 mesh). NMR spectra were measured on a Bruker spectrometer at 400 MHz for  $^1\text{H}$  spectra and 101 MHz for  $^{13}\text{C}$  spectra. For  $^1\text{H}$  NMR, tetramethylsilane (TMS) ( $\delta = 0$ ) in  $\text{CDCl}_3$  was used as an internal standard. For  $^{13}\text{C}$  NMR,  $\text{CDCl}_3$  ( $\delta = 77.0$ ) was used as an internal standard. The following abbreviations were used: s = singlet, d = doublet, t = triplet, m = multiplet, and br = broad. All coupling constants (J) are reported in Hertz (Hz). High resolution mass spectra were acquired on a Q-Exactive Focus Hybrid Quadrupole-Orbitrap Mass Spectrometer (Thermo Fisher). X-ray data were collected at 100 K using Bruker D8 VENTURE diffractometer with  $\text{Cu K}\alpha$  radiation.  $^1\text{H}$  NMR and  $^{13}\text{C}$  NMR data are given for all compounds in the Supporting Information for characterization purposes.

## 2. Experimental Procedures and Characterization Data

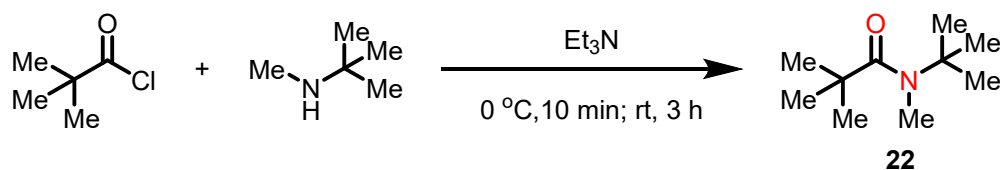

*N*-(*tert*-Butyl)-*N*-Methylpivalamide, colorless oil. Pivaloyl chloride (1.0 equiv, 3 mmol, 360.0 mg) was added dropwise to an ice-cooled stirred solution of *N*-Methyl-*tert*-butylamine (1.25 equiv, 3.75 mmol, 261.3 mg) and triethylamine (1.25 equiv, 3.75 mmol, 379.5 mg) in  $\text{CH}_2\text{Cl}_2$  (10 mL). After 10 min at  $0\text{ }^\circ\text{C}$ , the solution was stirred at room temperature for 3 h. The reaction was quenched with 1N HCl (10 mL), extracted with  $\text{CH}_2\text{Cl}_2$  ( $3\times 10\text{ mL}$ ). The combined organic layers were dried over anhydrous  $\text{MgSO}_4$  and the solvent was removed under reduced pressure. The crude mixture purified by column chromatography on silica gel, eluting with petroleum ether/ethyl acetate (20:1) to give the amide. Yield 78% (400 mg). The sample for x-ray crystallographic analysis was obtained by slow evaporation from  $\text{CH}_2\text{Cl}_2$ /hexane at  $-18\text{ }^\circ\text{C}$ .  $^1\text{H}$  NMR (400 MHz,  $\text{CDCl}_3$ )  $\delta$  2.92 (s, 3H), 1.36 (s, 9H), 1.26 (s, 9H).  $^{13}\text{C}$  NMR (101 MHz,  $\text{CDCl}_3$ )  $\delta$  179.9, 56.9, 40.5, 32.7, 28.9, 27.8. HRMS (ESI/Q-TOF)  $m/z$ :  $[\text{M}+\text{H}]^+$  Calcd for  $\text{C}_{10}\text{H}_{21}\text{NO}^+$ :172.1696; Found:172.1690.

### 3. Crystallographic Studies

#### Crystal Structure of **22**.

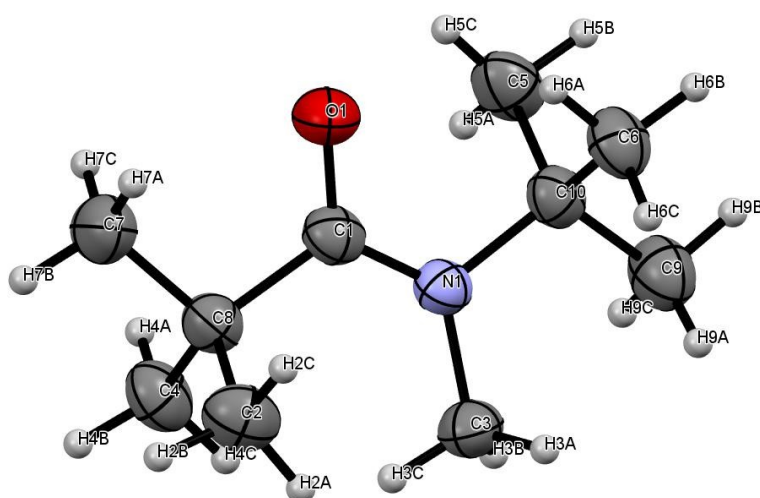

**Figure S1.** Crystal structure of **22** (50% ellipsoids). (Crystallographic data has been deposited with the Cambridge Crystallographic Data Center as supplementary publication no. CCDC 2166745.)

**Table S1.** Crystal Data and Structure Refinement Summary for **22**.

#### Crystal data

|                                |                                                         |
|--------------------------------|---------------------------------------------------------|
| $C_{10}H_{21}NO$               | $F(000) = 384$                                          |
| $M_r = 171.28$                 | $D_x = 1.060 \text{ Mg m}^{-3}$                         |
| Orthorhombic, $Pca2_1$         | Ga $K\alpha$ radiation, $\lambda = 1.34138 \text{ \AA}$ |
| $a = 17.280 (3) \text{ \AA}$   | Cell parameters from 5179 reflections                   |
| $b = 5.9478 (9) \text{ \AA}$   | $\theta = 5.8\text{--}54.2^\circ$                       |
| $c = 10.4426 (17) \text{ \AA}$ | $\mu = 0.33 \text{ mm}^{-1}$                            |
| $V = 1073.3 (3) \text{ \AA}^3$ | $T = 121 \text{ K}$                                     |
| $Z = 4$                        | Block, colourless                                       |

#### Data collection

|                                                                                                                                         |                                                                        |
|-----------------------------------------------------------------------------------------------------------------------------------------|------------------------------------------------------------------------|
| CCD diffractometer                                                                                                                      | $R_{\text{int}} = 0.049$                                               |
| Absorption correction: multi-scan <i>SADABS2016/2</i> (Bruker,2016/2) was used for absorption correction. $wR^2(\text{int})$ was 0.1316 | $\theta_{\text{max}} = 54.2^\circ$ , $\theta_{\text{min}} = 5.8^\circ$ |

|                                                                                                                                               |                          |
|-----------------------------------------------------------------------------------------------------------------------------------------------|--------------------------|
| before and 0.0846 after correction. The Ratio of minimum to maximum transmission is 0.5669. The $\lambda/2$ correction factor is Not present. |                          |
| $T_{\min} = 0.208, T_{\max} = 0.367$                                                                                                          | $h = -16 \rightarrow 20$ |
| 5708 measured reflections                                                                                                                     | $k = -7 \rightarrow 7$   |
| 1814 independent reflections                                                                                                                  | $l = -12 \rightarrow 12$ |
| 1714 reflections with $I > 2\sigma(I)$                                                                                                        |                          |

### Refinement

|                                  |                                                                                     |
|----------------------------------|-------------------------------------------------------------------------------------|
| Refinement on $F^2$              | Hydrogen site location: inferred from neighbouring sites                            |
| Least-squares matrix: full       | H-atom parameters constrained                                                       |
| $R[F^2 > 2\sigma(F^2)] = 0.050$  | $w = 1/[\sigma^2(F_o^2) + (0.0771P)^2 + 0.2076P]$<br>where $P = (F_o^2 + 2F_c^2)/3$ |
| $wR(F^2) = 0.146$                | $(\Delta/\sigma)_{\max} < 0.001$                                                    |
| $S = 1.16$                       | $\Delta_{\max} = 0.16 \text{ e } \text{\AA}^{-3}$                                   |
| 1814 reflections                 | $\Delta_{\min} = -0.19 \text{ e } \text{\AA}^{-3}$                                  |
| 117 parameters                   | Absolute structure: Refined as an inversion twin.                                   |
| 1 restraint                      | Absolute structure parameter: 0.4 (8)                                               |
| Primary atom site location: dual |                                                                                     |

### Special details

|                                                                                                                                                                                                                                                                                                                                                                                                                                                                                 |
|---------------------------------------------------------------------------------------------------------------------------------------------------------------------------------------------------------------------------------------------------------------------------------------------------------------------------------------------------------------------------------------------------------------------------------------------------------------------------------|
| <p><i>Geometry.</i> All esds (except the esd in the dihedral angle between two l.s. planes) are estimated using the full covariance matrix. The cell esds are taken into account individually in the estimation of esds in distances, angles and torsion angles; correlations between esds in cell parameters are only used when they are defined by crystal symmetry. An approximate (isotropic) treatment of cell esds is used for estimating esds involving l.s. planes.</p> |
| <p><i>Refinement.</i> Refined as a 2-component inversion twin.</p>                                                                                                                                                                                                                                                                                                                                                                                                              |

### Fractional atomic coordinates and isotropic or equivalent isotropic displacement parameters ( $\text{\AA}^2$ ) for (22)

|    | $x$           | $y$        | $z$        | $U_{\text{iso}}^*/U_{\text{eq}}$ |
|----|---------------|------------|------------|----------------------------------|
| O1 | 0.04673 (12)  | 0.1050 (4) | 0.5974 (3) | 0.0532 (7)                       |
| N1 | -0.00908 (14) | 0.2551 (4) | 0.7724 (3) | 0.0374 (6)                       |

|     |               |             |            |            |
|-----|---------------|-------------|------------|------------|
| C1  | 0.05255 (17)  | 0.2198 (5)  | 0.6949 (3) | 0.0399 (7) |
| C2  | 0.1724 (2)    | 0.2216 (6)  | 0.8406 (4) | 0.0530 (9) |
| H2A | 0.145556      | 0.269634    | 0.918613   | 0.079*     |
| H2B | 0.226495      | 0.270299    | 0.844133   | 0.079*     |
| H2C | 0.170204      | 0.057432    | 0.833677   | 0.079*     |
| C3  | -0.00260 (19) | 0.3460 (6)  | 0.9018 (3) | 0.0451 (7) |
| H3A | -0.013574     | 0.227075    | 0.964177   | 0.068*     |
| H3B | -0.039839     | 0.468761    | 0.912725   | 0.068*     |
| H3C | 0.049959      | 0.403096    | 0.915373   | 0.068*     |
| C4  | 0.12709 (18)  | 0.5838 (5)  | 0.7343 (4) | 0.0508 (9) |
| H4A | 0.103000      | 0.644715    | 0.656719   | 0.076*     |
| H4B | 0.179052      | 0.647544    | 0.744158   | 0.076*     |
| H4C | 0.095553      | 0.623163    | 0.808979   | 0.076*     |
| C5  | -0.1109 (2)   | 0.2272 (6)  | 0.6049 (4) | 0.0553 (9) |
| H5A | -0.110807     | 0.391795    | 0.600773   | 0.083*     |
| H5B | -0.163141     | 0.171161    | 0.586840   | 0.083*     |
| H5C | -0.074742     | 0.167122    | 0.541202   | 0.083*     |
| C6  | -0.08039 (18) | -0.1032 (5) | 0.7481 (4) | 0.0488 (8) |
| H6A | -0.042313     | -0.158300   | 0.686009   | 0.073*     |
| H6B | -0.130995     | -0.170149   | 0.729658   | 0.073*     |
| H6C | -0.064143     | -0.145126   | 0.834752   | 0.073*     |
| C7  | 0.1841 (2)    | 0.2772 (7)  | 0.6080 (4) | 0.0564 (9) |
| H7A | 0.191004      | 0.114278    | 0.599888   | 0.085*     |
| H7B | 0.234647      | 0.349020    | 0.619738   | 0.085*     |
| H7C | 0.159608      | 0.335906    | 0.530234   | 0.085*     |
| C8  | 0.13284 (16)  | 0.3276 (5)  | 0.7233 (3) | 0.0408 (7) |
| C9  | -0.1484 (2)   | 0.2308 (6)  | 0.8311 (4) | 0.0559 (9) |
| H9A | -0.135757     | 0.179918    | 0.917804   | 0.084*     |
| H9B | -0.198562     | 0.168261    | 0.805373   | 0.084*     |
| H9C | -0.151140     | 0.395412    | 0.829640   | 0.084*     |
| C10 | -0.08615 (15) | 0.1516 (5)  | 0.7384 (3) | 0.0397 (7) |

#### 4. <sup>1</sup>H and <sup>13</sup>C NMR Spectra

***N*-(*tert*-Butyl)-*N*-Methylpivalamide**

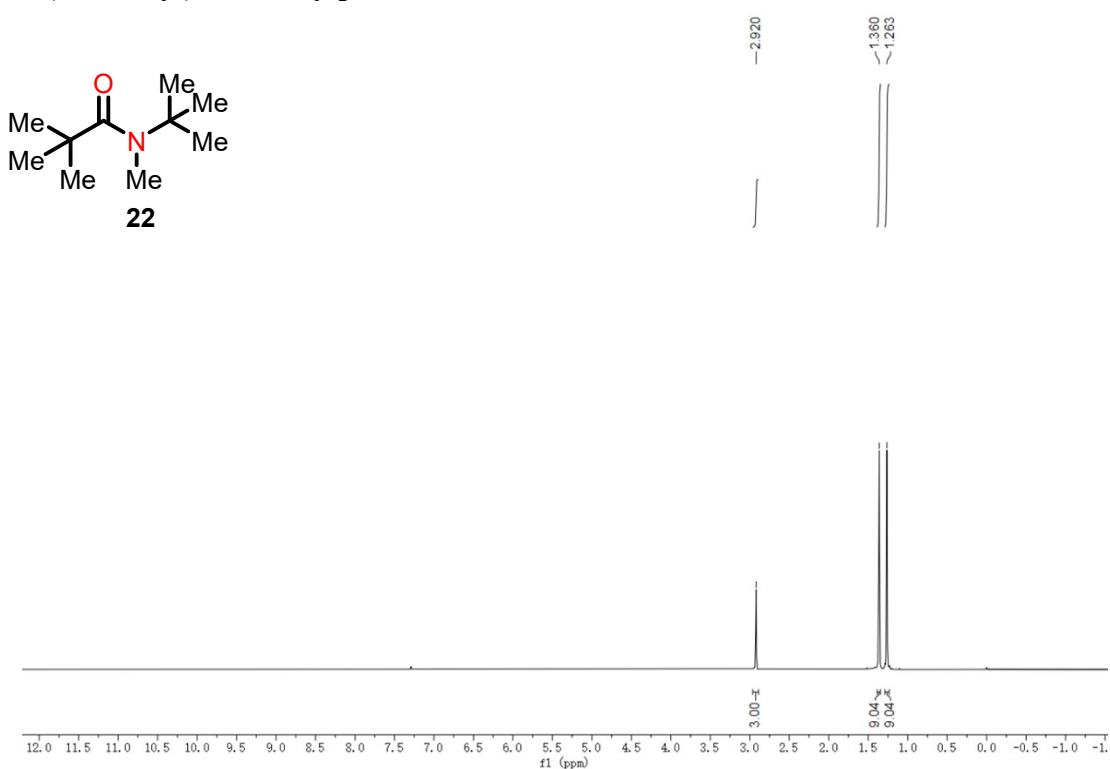

**Figure S2.**  $^1\text{H}$  NMR (400 MHz,  $\text{CDCl}_3$ ) Spectrum of Compound **22**.

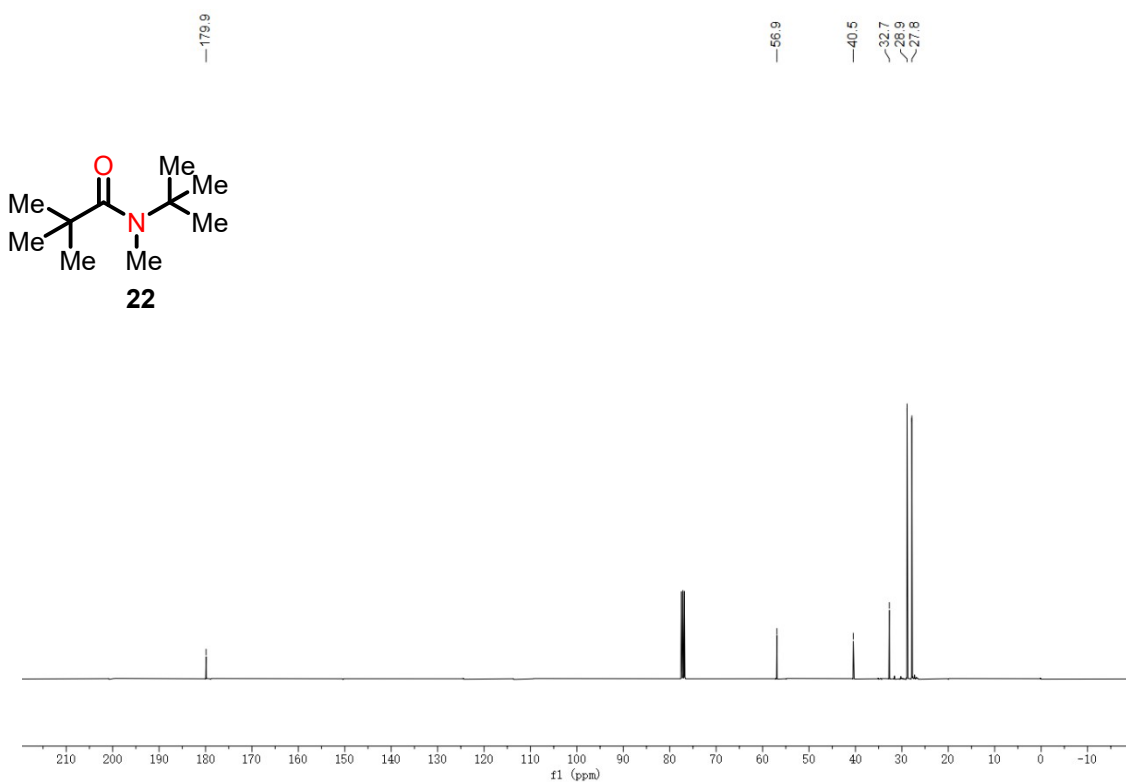

**Figure S3.**  $^{13}\text{C}$  NMR (101 MHz,  $\text{CDCl}_3$ ) Spectrum of Compound **22**.

**5. Computational data**

## COMPUTATIONAL DETAILS

All DFT calculations were performed with the Gaussian 16 set of programs.<sup>i</sup> The electronic configuration of the molecular systems was described with the hybrid GGA functional of Becke-Lee, Parr, and Yang (B3LYP),<sup>ii</sup> using the Ahlrichs basis set 6-311++G(d,p).<sup>iii</sup> Since corrections due to dispersion are essential to study the reactivity, we have included them through Grimme's GD3 method.<sup>iv</sup> The geometry optimizations were performed without symmetry constraints and the characterization of the local stationary points was carried out by analytical frequency calculations. These frequencies were used to calculate unscaled zero-point energies (ZPEs) as well as thermal corrections and entropy effects at 298.15 K and 1 atm. Solvent effects were included in the geometry optimizations with the Solvation Model based on Density (SMD)<sup>v</sup> using toluene as solvent.

## (MULTI)LINEAR ANALYSES

Xyz coordinates and absolute energies (in a.u.) of all computed species by DFT have been included in a single separated file.xyz with capability to visualize with an browse that opens files with .xyz extension.

Figure S4 gives details about the Winkler-Dunitz analyses and its components.

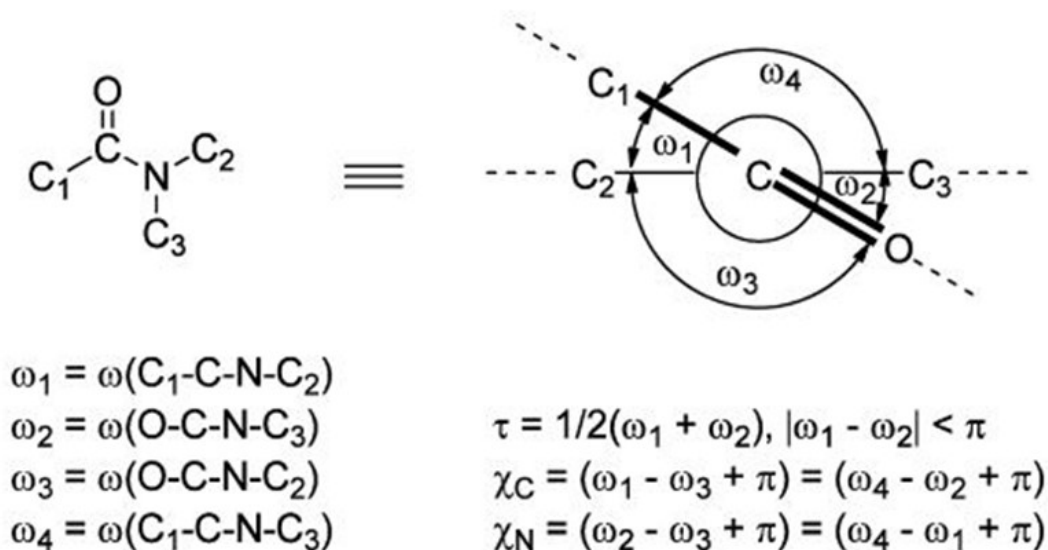

**Figure S4.** Winkler-Dunitz distortion parameters of amides bonds.

## Multi/linear analyses

About the linear and multilinear analyses, we have studied the variables included in Table S1 for the 46 compounds (23 amides and 23 thioamides). We have checked all the possible combinations including from 1 to 7 descriptors (*i.e.* millions of combinations) in order to obtain multilinear models. Of course, when adding more descriptors, the  $R^2$  value increases for sure, but then the significance of each variable is



even more important to be checked. The best fitted models are described below.

**Table S1.** All variables used for the multi/linear analyses.

## Thioamides

|    | <b>R</b>                         | <b>R'</b>   | <b>R''</b> | <b>cis</b> | <b>TS</b> | <b>trans</b> |
|----|----------------------------------|-------------|------------|------------|-----------|--------------|
| 1  | Ph                               | Ph          | Me         | 4.3        | -73       | 171.6        |
| 2  | C(Me)=CH <sub>2</sub>            | Ph          | Me         | -3.7       | -71       | -179.6       |
| 3  | cyclopropyl                      | Ph          | Me         | 0.3        | -74       | 179.2        |
| 4  | iPr                              | Ph          | Me         | 0.0        | -85       | -179.8       |
| 5  | t-Bu                             | Ph          | Me         | 8.8        | -78       | -179.4       |
| 6  | Me                               | Ph          | Me         | -0.3       | -73       | 178.3        |
| 13 | H                                | Ph          | Me         | 2.1        | -114      | -180.0       |
| 14 | NO <sub>2</sub>                  | Ph          | Me         | 1.4        | 73        | -178.3       |
| 15 | NMe <sub>2</sub>                 | Ph          | Me         | -17.2      | -79       | 146.5        |
| 16 | OMe                              | Ph          | Me         | 0.6        | -73       | -180.0       |
| 17 | t-Bu                             | t-Bu        | Me         | -34.8      | -64       | -132.4       |
| 23 | CF <sub>3</sub>                  | Ph          | Me         | 1.0        | -70       | 178.3        |
| 24 | C(CF <sub>3</sub> ) <sub>3</sub> | Ph          | Me         | -18.6      | -71       | 163.5        |
| 25 | NPh <sub>2</sub>                 | Ph          | Me         | -12.8      | -76       | 162.8        |
| 26 | NH <sub>2</sub>                  | Ph          | Me         | 0.1        | -74       | 178.8        |
| 31 | t-Bu                             | 1-adamantyl | Me         | -36.6      | -72.9     | -128.5       |
| 32 | t-Bu                             | 2-adamantyl | Me         | -20.6      | -74.0     | 143.3        |
| 33 | iPr                              | 1-adamantyl | Me         | 0.1        | -69.7     | 155.4        |
| 34 | iPr                              | 2-adamantyl | Me         | 1.0        | -66.9     | 182.3        |
| 39 | t-Bu                             | 1-adamantyl | Et         | -42.5      | -73.8     | -120.7       |
| 40 | t-Bu                             | 2-adamantyl | Et         | -2.2       | -109.9    | 154.3        |
| 41 | iPr                              | 1-adamantyl | Et         | -5.5       | -35.4     | 170.4        |
| 42 | iPr                              | 2-adamantyl | Et         | -2.9       | -66.0     | -174.6       |

## Amides

|    | <b>R</b>                         | <b>R'</b>   | <b>R''</b> | <b>cis</b> | <b>TS</b> | <b>trans</b> |
|----|----------------------------------|-------------|------------|------------|-----------|--------------|
| 7  | Ph                               | Ph          | Me         | 3.5        | -71       | 167.9        |
| 8  | C(Me)=CH <sub>2</sub>            | Ph          | Me         | -3.2       | -70       | -171.0       |
| 9  | cyclopropyl                      | Ph          | Me         | 0.0        | -73       | 178.0        |
| 10 | iPr                              | Ph          | Me         | 0.0        | -85       | -176.6       |
| 11 | t-Bu                             | Ph          | Me         | 0.1        | -79       | -176.8       |
| 12 | Me                               | Ph          | Me         | 1.0        | -72       | -174.6       |
| 18 | H                                | Ph          | Me         | 0.0        | -115      | 174.6        |
| 19 | NO <sub>2</sub>                  | Ph          | Me         | 0.0        | -109      | 176.2        |
| 20 | NMe <sub>2</sub>                 | Ph          | Me         | -11.2      | -77       | 125.2        |
| 21 | OMe                              | Ph          | Me         | 0.0        | -73       | 176.0        |
| 22 | t-Bu                             | t-Bu        | Me         | 27.3       | -48       | 145.3        |
| 27 | CF <sub>3</sub>                  | Ph          | Me         | -0.4       | -72       | 175.0        |
| 28 | C(CF <sub>3</sub> ) <sub>3</sub> | Ph          | Me         | -6.5       | -73       | 165.7        |
| 29 | NPh <sub>2</sub>                 | Ph          | Me         | 9.4        | -69       | -158.2       |
| 30 | NH <sub>2</sub>                  | Ph          | Me         | 7.6        | -73       | 173.1        |
| 35 | t-Bu                             | 1-adamantyl | Me         | -28.8      | -46.8     | -144.1       |
| 36 | t-Bu                             | 2-adamantyl | Me         | -4.5       | -71.5     | 153.7        |
| 37 | iPr                              | 1-adamantyl | Me         | 0.0        | -68.9     | 180.0        |
| 38 | iPr                              | 2-adamantyl | Me         | -0.1       | -72.2     | 171.3        |
| 43 | t-Bu                             | 1-adamantyl | Et         | -35.1      | -77.4     | -145.6       |
| 44 | t-Bu                             | 2-adamantyl | Et         | -0.3       | -90.6     | 141.6        |
| 45 | iPr                              | 1-adamantyl | Et         | -1.3       | -54.5     | 177.4        |
| 46 | iPr                              | 2-adamantyl | Et         | -0.4       | -69.4     | 176.8        |

Thioamides cis

|    | $\omega_1$ | $\omega_2$ | $\omega_3$ | $\omega_4$ | $\tau$ |      | $X_C$ |      | $X_N$ |      |
|----|------------|------------|------------|------------|--------|------|-------|------|-------|------|
| 1  | -172.9     | -165.45    | 4.3        | 17.36      | 10.8   | 12.0 | 2.8   | 4.7  | 10.3  | 17.2 |
| 2  | 173.9      | 167.15     | -3.7       | -15.29     | -9.5   | 10.5 | -2.4  | 4.1  | -9.2  | 15.3 |
| 3  | -179.7     | -178.96    | 0.3        | 1.08       | 0.7    | 0.8  | 0.0   | 0.1  | 0.8   | 1.3  |
| 4  | 180.0      | 180.0      | 0.0        | -0.007     | 0.0    | 0.0  | 0.0   | 0.0  | 0.0   | 0.0  |
| 5  | -169.1     | -149.9     | 8.8        | 32.2       | 20.5   | 22.8 | 2.1   | 3.5  | 21.3  | 35.5 |
| 6  | 179.7      | 179.07     | -0.3       | -0.92      | -0.6   | 0.7  | 0.0   | 0.0  | -0.6  | 1.0  |
| 13 | -176.9     | -178.85    | 2.1        | 2.2        | 2.1    | 2.4  | 1.1   | 1.8  | -0.9  | 1.5  |
| 14 | -176.9     | -177.58    | 1.4        | 4.21       | 2.8    | 3.1  | 1.8   | 3.0  | 1.1   | 1.8  |
| 15 | 162.7      | 134.66     | -17.2      | -45.42     | -31.3  | 34.8 | -0.1  | 0.1  | -28.1 | 46.9 |
| 16 | -179.2     | -179.37    | 0.6        | 0.819      | 0.7    | 0.8  | 0.2   | 0.3  | 0.0   | 0.0  |
| 17 | 135.9      | 115.73     | -34.8      | -73.6      | -54.2  | 60.2 | -9.3  | 15.6 | -29.5 | 49.1 |
| 23 | -179.3     | -177.37    | 1.0        | 2.41       | 1.7    | 1.9  | -0.2  | 0.4  | 1.7   | 2.8  |
| 24 | 155.6      | 129.86     | -18.6      | -55.9      | -37.3  | 41.4 | -5.8  | 9.7  | -31.6 | 52.6 |
| 25 | 165.1      | 153.61     | -12.8      | -28.57     | -20.7  | 23.0 | -2.2  | 3.6  | -13.6 | 22.7 |
| 26 | 179.8      | -178.79    | 0.1        | 0.9        | 0.5    | 0.6  | -0.3  | 0.5  | 1.1   | 1.8  |
| 31 | 134.2      | 112.2      | -36.6      | -77.0      | -56.8  | 63.1 | -9.2  | 15.3 | -31.2 | 52.0 |
| 32 | 155.6      | 139.8      | -20.6      | -44.0      | -32.3  | 35.9 | -3.8  | 6.3  | -19.6 | 32.7 |
| 33 | -179.9     | -179.8     | 0.1        | 0.2        | 0.2    | 0.2  | 0.0   | 0.0  | 0.1   | 0.2  |
| 34 | -179.8     | -170.8     | 1.0        | 8.4        | 4.7    | 5.2  | -0.8  | 1.3  | 8.2   | 13.6 |
| 39 | 129.7      | 100.0      | -42.5      | -87.8      | -65.1  | 72.4 | -7.8  | 13.0 | -37.5 | 62.5 |
| 40 | 177.3      | -179.6     | -2.2       | -0.1       | -1.2   | 1.3  | -0.5  | 0.8  | 2.6   | 4.3  |
| 41 | 173.1      | 166.8      | -5.5       | -14.5      | -10.0  | 11.2 | -1.4  | 2.3  | -7.6  | 12.7 |
| 42 | 175.8      | 174.1      | -2.9       | -7.1       | -5.0   | 5.6  | -1.2  | 2.1  | -2.9  | 4.9  |

Amides cis

|    | $\omega_1$ | $\omega_2$ | $\omega_3$ | $\omega_4$ | $\tau$ |      | $X_C$ |      | $X_N$ |      |
|----|------------|------------|------------|------------|--------|------|-------|------|-------|------|
| 7  | -174.1     | -157.93    | 3.5        | 24.53      | 14.0   | 15.6 | 2.5   | 4.1  | 18.6  | 31.0 |
| 8  | 173.8      | 159.31     | -3.2       | -23.73     | -13.5  | 15.0 | -3.0  | 5.1  | -17.5 | 29.2 |
| 9  | -178.5     | -167.69    | 0.0        | 13.75      | 6.9    | 7.6  | 1.4   | 2.4  | 12.3  | 20.5 |
| 10 | -180.0     | 179.99     | 0.0        | 0.009      | 0.0    | 0.0  | 0.0   | 0.0  | 0.0   | 0.0  |
| 11 | -178.3     | 177.92     | 0.1        | -3.91      | -0.2   | 0.2  | 1.7   | 2.8  | -2.2  | 3.6  |
| 12 | -179.3     | 174.77     | 1.0        | -5.5       | -2.3   | 2.5  | -0.3  | 0.5  | -6.2  | 10.3 |
| 18 | -180.0     | 179.99     | 0.0        | -0.004     | 0.0    | 0.0  | 0.0   | 0.0  | 0.0   | 0.0  |
| 19 | -180.0     | 179.95     | 0.0        | 0.04       | 0.0    | 0.0  | 0.1   | 0.2  | 0.0   | 0.0  |
| 20 | 168.1      | 137.12     | -11.2      | -43.61     | -27.4  | 30.4 | -0.7  | 1.2  | -31.7 | 52.8 |
| 21 | 180.0      | -179.98    | 0.0        | -0.03      | 0.0    | 0.0  | -0.1  | 0.1  | 0.0   | 0.0  |
| 22 | -140.2     | -122.04    | 27.3       | 70.44      | 48.9   | 54.3 | 12.5  | 20.8 | 30.6  | 51.0 |
| 27 | -179.6     | -172.74    | -0.4       | 8.06       | 3.8    | 4.3  | 0.8   | 1.3  | 7.6   | 12.7 |
| 28 | 165.8      | 146.41     | -6.5       | -41.31     | -23.9  | 26.6 | -7.7  | 12.9 | -27.1 | 45.2 |
| 29 | -169.3     | -148.19    | 9.4        | 33.07      | 21.2   | 23.6 | 1.3   | 2.1  | 22.4  | 37.4 |
| 30 | -174.1     | 177.07     | 7.6        | -4.64      | 1.5    | 1.7  | -1.7  | 2.8  | -10.6 | 17.6 |
| 35 | 138.7      | 119.0      | -28.8      | -73.6      | -51.2  | 56.9 | -12.6 | 21.0 | -32.3 | 53.8 |
| 36 | 170.6      | 162.7      | -4.5       | -22.2      | -13.4  | 14.8 | -4.9  | 8.2  | -12.8 | 21.4 |
| 37 | -179.6     | -177.5     | 0.0        | 2.9        | 1.4    | 1.6  | 0.4   | 0.6  | 2.5   | 4.1  |
| 38 | -179.3     | -167.8     | -0.1       | 13.0       | 6.4    | 7.2  | 0.9   | 1.4  | 12.3  | 20.5 |
| 43 | 133.5      | 105.2      | -35.1      | -86.2      | -60.6  | 67.4 | -11.4 | 19.0 | -39.7 | 66.1 |
| 44 | -178.3     | -172.6     | -0.3       | 9.4        | 4.5    | 5.0  | 2.0   | 3.3  | 7.7   | 12.8 |
| 45 | 177.2      | 174.1      | -1.3       | -7.4       | -4.3   | 4.8  | -1.5  | 2.5  | -4.6  | 7.7  |
| 46 | -179.0     | 178.9      | -0.4       | 179.0      | 0.0    | 0.0  | 1.4   | 2.4  | -0.7  | 1.2  |

## Thioamides trans

|    | $\omega_1$ | $\omega_2$ | $\omega_3$ | $\omega_4$ | $\tau$ |      | $X_C$  |       | $X_N$  |       |
|----|------------|------------|------------|------------|--------|------|--------|-------|--------|-------|
| 1  | 171.2      | 171.6      | -6.9       | -10.3      | -8.6   | 9.6  | -1.9   | 3.2   | -1.4   | 2.4   |
| 2  | 176.2      | -179.6     | -1.1       | -2.3       | -1.7   | 1.9  | -2.7   | 4.5   | 1.5    | 2.5   |
| 3  | 179.4      | 179.2      | -0.7       | -0.73      | -0.7   | 0.8  | 0.1    | 0.1   | -0.1   | 0.2   |
| 4  | -178.7     | -179.8     | -1.6       | 3.19       | 0.8    | 0.9  | 3.0    | 5.0   | 1.9    | 3.1   |
| 5  | 177.9      | -179.4     | 2.6        | 1.14       | -0.7   | 0.8  | -4.7   | 7.8   | -2.0   | 3.4   |
| 6  | -178.1     | 178.3      | 2.3        | -2.16      | 0.1    | 0.1  | -0.4   | 0.7   | -4.0   | 6.7   |
| 13 | 180.0      | -180.0     | 0.0        | 0.02       | 0.0    | 0.0  | 0.0    | 0.0   | 0.0    | 0.0   |
| 14 | 175.4      | -178.3     | -3.7       | 0.84       | -1.4   | 1.6  | -0.9   | 1.5   | 5.4    | 9.1   |
| 15 | 159.6      | 146.5      | -21.3      | -32.62     | -27.0  | 30.0 | 0.9    | 1.5   | -12.2  | 20.4  |
| 16 | -180.0     | -180.0     | 0.0        | 0.007      | 0.0    | 0.0  | 0.0    | 0.0   | 0.0    | 0.0   |
| 17 | -150.3     | -132.4     | 29.2       | 48.19      | 38.7   | 43.0 | 0.6    | 1.0   | 18.4   | 30.7  |
| 23 | -177.5     | 178.3      | 3.2        | -2.36      | 0.4    | 0.4  | -0.7   | 1.1   | -4.8   | 8.1   |
| 24 | 169.8      | 163.5      | -6.8       | -19.96     | -13.4  | 14.9 | -3.4   | 5.7   | -9.7   | 16.2  |
| 25 | 162.7      | 162.8      | -16.5      | -18.03     | -17.3  | 19.2 | -0.8   | 1.3   | -0.8   | 1.3   |
| 26 | -179.6     | 178.8      | -0.6       | -0.18      | -0.4   | 0.5  | 1.1    | 1.8   | -0.6   | 1.0   |
| 31 | -148.4     | -128.5     | 30.9       | 52.2       | 41.6   | 46.2 | 0.7    | 1.2   | 20.6   | 34.3  |
| 32 | 159.6      | 143.3      | -22.3      | -34.8      | -28.6  | 31.8 | 1.9    | 3.1   | -14.4  | 24.0  |
| 33 | 164.0      | 155.4      | -15.5      | -25.1      | -20.3  | 22.5 | -0.5   | 0.8   | -9.1   | 15.1  |
| 34 | 169.2      | 182.3      | -11.8      | -16.7      | -4.3   | 4.7  | 1.0    | 1.6   | 14.1   | 23.4  |
| 39 | -148.3     | -120.7     | -148.3     | 61.3       | 45.5   | 50.6 | -180.0 | 300.0 | -152.4 | 254.0 |
| 40 | 166.0      | 154.3      | -14.4      | -25.3      | -19.9  | 22.1 | 0.4    | 0.7   | -11.3  | 18.8  |
| 41 | 170.3      | 170.4      | -8.0       | -11.3      | -9.7   | 10.7 | -1.8   | 2.9   | -1.6   | 2.7   |
| 42 | -170.2     | -174.6     | 8.1        | 7.1        | 7.6    | 8.4  | 1.7    | 2.9   | -2.7   | 4.5   |

## Amides trans

|    | $\omega_1$ | $\omega_2$ | $\omega_3$ | $\omega_4$ | $\tau$ |      | $X_C$ |     | $X_N$ |      |
|----|------------|------------|------------|------------|--------|------|-------|-----|-------|------|
| 7  | 170.5      | 167.9      | -8.3       | -13.26     | -10.8  | 12.0 | -1.2  | 2.0 | -3.8  | 6.3  |
| 8  | -171.7     | -171.0     | 7.4        | 9.93       | 8.6    | 9.6  | 0.9   | 1.5 | 1.6   | 2.7  |
| 9  | -177.0     | 178.0      | 2.8        | -1.91      | 0.5    | 0.5  | 0.1   | 0.2 | -4.9  | 8.1  |
| 10 | 174.5      | -176.6     | -3.9       | 1.76       | -1.1   | 1.2  | -1.6  | 2.7 | 7.3   | 12.1 |
| 11 | 177.2      | -176.8     | -3.6       | 3.91       | 0.2    | 0.2  | 0.8   | 1.3 | 6.8   | 11.3 |
| 12 | 176.4      | -174.6     | -3.7       | 5.51       | 0.9    | 1.0  | 0.1   | 0.1 | 9.1   | 15.2 |
| 18 | -179.5     | 174.6      | 0.4        | -5.36      | -2.5   | 2.7  | 0.1   | 0.1 | -5.9  | 9.8  |
| 19 | -177.0     | 176.2      | 2.8        | -3.55      | -0.4   | 0.4  | 0.2   | 0.4 | -6.5  | 10.9 |
| 20 | 147.5      | 125.2      | -33.7      | -53.69     | -43.7  | 48.5 | 1.2   | 1.9 | -21.2 | 35.3 |
| 21 | -175.2     | 176.0      | 4.6        | -3.89      | 0.4    | 0.4  | 0.2   | 0.3 | -8.7  | 14.5 |
| 22 | 163.8      | 145.3      | -12.0      | -38.95     | -25.5  | 28.3 | -4.3  | 7.1 | -22.7 | 37.9 |
| 27 | -179.0     | 175.0      | 1.6        | -5.58      | -2.0   | 2.2  | -0.6  | 0.9 | -6.6  | 11.1 |
| 28 | 173.4      | 165.7      | -3.3       | -17.64     | -10.5  | 11.6 | -3.3  | 5.5 | -11.0 | 18.3 |
| 29 | -158.8     | -158.2     | 21.7       | 21.31      | 21.5   | 23.9 | -0.5  | 0.9 | 0.1   | 0.2  |
| 30 | -176.1     | 173.1      | 1.6        | -4.5       | -1.5   | 1.6  | 2.4   | 3.9 | -8.4  | 14.0 |
| 35 | -162.9     | -144.1     | 12.3       | 40.7       | 26.5   | 29.4 | 4.7   | 7.9 | 23.6  | 39.3 |
| 36 | 170.8      | 153.7      | -6.9       | -28.6      | -17.7  | 19.7 | -2.3  | 3.8 | -19.4 | 32.3 |
| 37 | 180.0      | 180.0      | 0.0        | 0.0        | 0.0    | 0.0  | 0.0   | 0.0 | 0.0   | 0.0  |
| 38 | 174.6      | 171.3      | -4.4       | -9.8       | -7.1   | 7.9  | -1.1  | 1.8 | -4.4  | 7.3  |
| 43 | -170.3     | -145.6     | 7.3        | 36.8       | 22.0   | 24.5 | 2.4   | 4.1 | 27.1  | 45.2 |
| 44 | 157.3      | 141.6      | -19.1      | -42.0      | -30.5  | 33.9 | -3.6  | 6.0 | -19.3 | 32.2 |
| 45 | 176.7      | 177.4      | -1.6       | -4.3       | -2.9   | 3.2  | -1.7  | 2.8 | -1.0  | 1.7  |
| 46 | -179.5     | 176.8      | 1.5        | -4.2       | -1.3   | 1.5  | -1.0  | 1.6 | -4.7  | 7.8  |

## Thioamides TS

|    | $\omega_1$ | $\omega_2$ | $\omega_3$ | $\omega_4$ | $\tau$ |       | $X_C$ |      | $X_N$ |      |
|----|------------|------------|------------|------------|--------|-------|-------|------|-------|------|
| 1  | 105.7      | 78.0       | -72.9      | -103.4     | -88.2  | 98.0  | -1.4  | 2.3  | -29.1 | 48.5 |
| 2  | 107.0      | 79.3       | -71.5      | -102.2     | -86.8  | 96.5  | -1.5  | 2.5  | -29.2 | 48.7 |
| 3  | 104.6      | 75.5       | -74.2      | -105.8     | -90.0  | 100.0 | -1.3  | 2.1  | -30.4 | 50.6 |
| 4  | 97.2       | 60.1       | -85.2      | -117.5     | 78.7   | 87.4  | 2.4   | 4.0  | -34.7 | 57.9 |
| 5  | 98.7       | 75.4       | -78.3      | -107.6     | 87.1   | 96.7  | -3.0  | 5.0  | -26.3 | 43.9 |
| 6  | 104.5      | 77.1       | -73.5      | -104.9     | -89.2  | 99.1  | -2.0  | 3.3  | -29.5 | 49.1 |
| 13 | 62.8       | 105.0      | -114.9     | -77.3      | 83.9   | 93.3  | -2.3  | 3.8  | 39.9  | 66.5 |
| 14 | 100.8      | 73.3       | -82.6      | -103.3     | 87.1   | 96.8  | 3.4   | 5.7  | -24.1 | 40.1 |
| 15 | 98.8       | 70.4       | -79.5      | -111.3     | 84.6   | 94.0  | -1.7  | 2.9  | -30.1 | 50.2 |
| 16 | 105.1      | 76.2       | -73.5      | -105.2     | -89.3  | 99.3  | -1.4  | 2.4  | -30.3 | 50.6 |
| 17 | 111.2      | 73.0       | -64.4      | -111.3     | -87.9  | 97.6  | -4.3  | 7.2  | -42.5 | 70.9 |
| 23 | 105.5      | 78.6       | -70.4      | -105.4     | -87.9  | 97.7  | -4.0  | 6.7  | -30.9 | 51.6 |
| 24 | 103.9      | 77.4       | -71.0      | -107.7     | -89.4  | 99.3  | -5.1  | 8.5  | -31.6 | 52.7 |
| 25 | 103.3      | 80.2       | -75.7      | -100.8     | -88.2  | 98.1  | -1.0  | 1.6  | -24.2 | 40.3 |
| 26 | 105.1      | 70.9       | -73.6      | -110.4     | 88.0   | 97.8  | -1.3  | 2.2  | -35.5 | 59.1 |
| 31 | 101.3      | 78.0       | -72.9      | -107.8     | 89.6   | 99.6  | -5.8  | 9.7  | -29.1 | 48.5 |
| 32 | 103.6      | 64.5       | -74.0      | -117.8     | 84.1   | 93.4  | -2.3  | 3.8  | -41.5 | 69.1 |
| 33 | 111.1      | 65.9       | -69.7      | -113.2     | 88.5   | 98.3  | 0.9   | 1.4  | -44.3 | 73.9 |
| 34 | 108.8      | 69.4       | -66.9      | -114.8     | 89.1   | 99.0  | -4.3  | 7.1  | -43.7 | 72.8 |
| 39 | 102.6      | 67.7       | -73.8      | -115.9     | 85.1   | 94.6  | -3.6  | 6.0  | -38.5 | 64.1 |
| 40 | 90.9       | 47.8       | -95.2      | -126.1     | 69.4   | 77.1  | 6.1   | 10.2 | -37.0 | 61.6 |
| 41 | 139.7      | 103.9      | -35.4      | -81.1      | -58.2  | 64.7  | -4.9  | 8.2  | -40.7 | 67.9 |
| 42 | 112.0      | 68.5       | -66.0      | -113.5     | -89.8  | 99.7  | -2.0  | 3.3  | -45.5 | 75.8 |

## Amides TS

|    | $\omega_1$ | $\omega_2$ | $\omega_3$ | $\omega_4$ | $\tau$ |       | $X_C$ |      | $X_N$ |      |
|----|------------|------------|------------|------------|--------|-------|-------|------|-------|------|
| 7  | 106.6      | 74.9       | -71.5      | -107.0     | -89.2  | 99.1  | -1.9  | 3.2  | -33.6 | 56.0 |
| 8  | 107.5      | 75.9       | -70.5      | -106.1     | -88.3  | 98.1  | -2.0  | 3.4  | -33.6 | 56.0 |
| 9  | 105.9      | 72.7       | -72.7      | -108.7     | 89.3   | 99.2  | -1.4  | 2.3  | -34.6 | 57.7 |
| 10 | 101.0      | 63.3       | -81.0      | -114.7     | 82.2   | 91.3  | 2.0   | 3.3  | -35.7 | 59.5 |
| 11 | 99.0       | 69.9       | -79.2      | -111.9     | 84.5   | 93.8  | -1.8  | 2.9  | -30.9 | 51.5 |
| 12 | 105.5      | 74.6       | -72.5      | -107.5     | -90.0  | 100.0 | -2.1  | 3.5  | -33.0 | 54.9 |
| 18 | 63.9       | 107.2      | -115.1     | -73.8      | 85.5   | 95.0  | -1.0  | 1.6  | 42.3  | 70.5 |
| 19 | 70.9       | 103.7      | -108.8     | -76.6      | 87.3   | 97.0  | -0.3  | 0.5  | 32.5  | 54.2 |
| 20 | 101.5      | 70.0       | -77.0      | -111.6     | 85.7   | 95.3  | -1.6  | 2.6  | -33.1 | 55.1 |
| 21 | 105.8      | 73.6       | -72.7      | -107.9     | 89.7   | 99.7  | -1.6  | 2.6  | -33.7 | 56.2 |
| 22 | 123.8      | 83.8       | -48.3      | -104.1     | -76.2  | 84.6  | -7.9  | 13.2 | -47.9 | 79.8 |
| 27 | 105.1      | 76.8       | -71.6      | -106.5     | -89.0  | 98.9  | -3.3  | 5.5  | -31.6 | 52.6 |
| 28 | 101.3      | 69.0       | -73.2      | -116.5     | 85.1   | 94.6  | -5.5  | 9.1  | -37.8 | 63.0 |
| 29 | 109.5      | 83.7       | -69.5      | -97.3      | -83.4  | 92.7  | -1.1  | 1.8  | -26.8 | 44.7 |
| 30 | 105.4      | 69.0       | -73.2      | -112.4     | 87.2   | 96.9  | -1.4  | 2.3  | -37.8 | 63.0 |
| 35 | 124.9      | 85.8       | -46.8      | -102.4     | -74.6  | 82.9  | -8.2  | 13.7 | -47.3 | 78.9 |
| 36 | 108.8      | 74.9       | -71.5      | -104.8     | -88.1  | 97.9  | 0.3   | 0.4  | -33.6 | 56.0 |
| 37 | 112.4      | 62.0       | -68.9      | -116.7     | 87.2   | 96.9  | 1.3   | 2.2  | -49.1 | 81.8 |
| 38 | 111.8      | 59.0       | -72.2      | -117.0     | 85.4   | 94.9  | 4.0   | 6.7  | -48.8 | 81.3 |
| 43 | 102.5      | 55.9       | -77.4      | -124.3     | 79.2   | 88.0  | -0.2  | 0.3  | -46.8 | 78.0 |
| 44 | 98.0       | 45.0       | -90.6      | -126.3     | 71.5   | 79.5  | 8.6   | 14.4 | -44.4 | 74.0 |
| 45 | 119.8      | 74.9       | -54.5      | -110.9     | -82.7  | 91.9  | -5.7  | 9.6  | -50.6 | 84.4 |
| 46 | 113.8      | 71.6       | -69.4      | -105.3     | -87.3  | 97.0  | 3.1   | 5.2  | -39.0 | 65.1 |

| Thioamides |        | HOMO  |          | LUMO  |       |        | HOMO-LUMO gap |         | Dipole moment |        |
|------------|--------|-------|----------|-------|-------|--------|---------------|---------|---------------|--------|
|            |        | trans | cis      | trans | cis   | trans  | cis           | trans   | cis           | trans  |
| 1          | -72.9  | 171.6 | -0.21026 | -0.2  | -0.06 | -0.052 | 0.15          | 0.15277 | 5.9002        | 5.4691 |
| 2          | -71.5  | 179.6 | -0.21183 | -0.2  | -0.05 | -0.037 | 0.1585        | 0.16704 | 5.8198        | 5.5694 |
| 3          | -74.2  | 179.2 | -0.20988 | -0.2  | -0.04 | -0.034 | 0.173         | 0.17046 | 6.2839        | 5.6122 |
| 4          | -85.2  | 179.8 | -0.20753 | -0.2  | -0.04 | -0.034 | 0.1707        | 0.16884 | 6.3521        | 5.6305 |
| 5          | -78.3  | 179.4 | -0.20673 | -0.2  | -0.05 | -0.026 | 0.1574        | 0.17096 | 5.6472        | 5.3942 |
| 6          | -73.5  | 178.3 | -0.20819 | -0.2  | -0.03 | -0.033 | 0.1735        | 0.17024 | 6.5565        | 5.9198 |
| 13         | -114.9 | 180.0 | -0.21809 | -0.21 | -0.05 | -0.039 | 0.166         | 0.17366 | 6.0362        | 5.9643 |
| 14         | -82.6  | 178.3 | -0.24825 | -0.24 | -0.1  | -0.1   | 0.1507        | 0.14498 | 7.0541        | 7.1549 |
| 15         | -79.5  | 146.5 | -0.20651 | -0.2  | -0.04 | -0.027 | 0.1706        | 0.17382 | 5.8631        | 5.8790 |
| 16         | -73.5  | 180.0 | -0.22057 | -0.22 | -0.03 | -0.024 | 0.1929        | 0.19171 | 4.5036        | 4.1077 |
| 17         | -64.4  | 132.4 | -0.20759 | -0.2  | -0.06 | -0.048 | 0.1467        | 0.15398 | 4.5893        | 4.9291 |
| 23         | -70.4  | 178.3 | -0.23416 | -0.23 | -0.07 | -0.071 | 0.1637        | 0.15824 | 6.2327        | 5.8725 |
| 24         | -71.0  | 163.5 | -0.24071 | -0.23 | -0.09 | -0.075 | 0.147         | 0.15236 | 5.7130        | 5.6971 |
| 25         | -75.7  | 162.8 | -0.2111  | -0.21 | -0.05 | -0.044 | 0.1611        | 0.16075 | 5.6895        | 5.2504 |
| 26         | -73.6  | 178.8 | -0.2089  | -0.2  | -0.03 | -0.023 | 0.174         | 0.18189 | 7.2711        | 6.5584 |
| 31         | -72.9  | 128.5 | -0.20675 | -0.2  | -0.06 | -0.05  | 0.1449        | 0.15146 | 4.3057        | 4.6729 |
| 32         | -74.0  | 143.3 | -0.20042 | -0.2  | -0.04 | -0.041 | 0.1585        | 0.15824 | 5.6426        | 5.0957 |
| 33         | -69.7  | 155.4 | -0.19625 | -0.2  | -0.03 | -0.034 | 0.1704        | 0.16199 | 6.1462        | 5.4092 |
| 34         | -66.9  | 182.3 | -0.1986  | -0.2  | -0.03 | -0.032 | 0.1708        | 0.16546 | 6.0067        | 5.4761 |
| 39         | -73.8  | 120.7 | -0.20933 | -0.2  | -0.07 | -0.054 | 0.14          | 0.14915 | 3.6251        | 4.4010 |
| 40         | -109.9 | 154.3 | -0.19274 | -0.2  | -0.03 | -0.037 | 0.1633        | 0.15849 | 5.9973        | 5.3009 |
| 41         | -35.4  | 170.4 | -0.19625 | -0.19 | -0.03 | -0.03  | 0.1665        | 0.16386 | 5.9452        | 5.6930 |
| 42         | -66.0  | 174.6 | -0.19718 | -0.2  | -0.03 | -0.031 | 0.168         | 0.16653 | 5.8794        | 5.6584 |
| Amides     |        | <hr/> |          |       |       |        |               |         |               |        |
| 7          | -71.5  | 167.9 | -0.238   | -0.24 | -0.05 | -0.04  | 0.1928        | 0.20197 | 4.3808        | 4.2564 |
| 8          | -70.5  | 171.0 | -0.2393  | -0.24 | -0.04 | -0.031 | 0.2032        | 0.21184 | 4.1451        | 4.0438 |
| 9          | -72.7  | 178.0 | -0.24533 | -0.23 | -0.03 | -0.022 | 0.2164        | 0.20925 | 4.4624        | 4.2381 |
| 10         | -81.0  | 176.6 | -0.2473  | -0.24 | -0.03 | -0.019 | 0.2191        | 0.22535 | 4.7223        | 4.2538 |
| 11         | -79.2  | 176.8 | -0.24476 | -0.24 | -0.03 | -0.018 | 0.2163        | 0.2268  | 4.5210        | 4.0789 |
| 12         | -72.5  | 174.6 | -0.25008 | -0.23 | -0.03 | -0.022 | 0.2206        | 0.20949 | 4.8596        | 4.4856 |
| 18         | -115.1 | 174.6 | -0.25785 | -0.23 | -0.03 | -0.029 | 0.2272        | 0.20369 | 5.1439        | 4.4878 |
| 19         | -108.8 | 176.2 | -0.27637 | -0.26 | -0.09 | -0.098 | 0.183         | 0.16338 | 6.8059        | 6.6139 |
| 20         | -77.0  | 125.2 | -0.22468 | -0.21 | -0.02 | -0.014 | 0.2007        | 0.19711 | 4.0018        | 4.9364 |
| 21         | -72.7  | 176.0 | -0.25374 | -0.23 | -0.02 | -0.019 | 0.2299        | 0.21191 | 2.9436        | 2.8210 |
| 22         | -48.3  | 145.3 | -0.22775 | -0.23 | -0.01 | -0.009 | 0.2179        | 0.22568 | 3.5813        | 3.7315 |
| 27         | -71.6  | 175.0 | -0.25462 | -0.25 | -0.04 | -0.042 | 0.212         | 0.21061 | 5.6094        | 5.1300 |
| 28         | -73.2  | 165.7 | -0.26823 | -0.27 | -0.05 | -0.032 | 0.2213        | 0.23525 | 5.7986        | 5.3836 |
| 29         | -69.5  | 158.2 | -0.21433 | -0.22 | -0.03 | -0.03  | 0.1817        | 0.18737 | 4.4289        | 4.1217 |
| 30         | -73.2  | 173.1 | -0.23402 | -0.23 | -0.03 | -0.018 | 0.2063        | 0.2104  | 4.7112        | 4.8623 |
| 35         | -46.8  | 144.1 | -0.22565 | -0.23 | -0.01 | -0.011 | 0.2154        | 0.22129 | 3.3888        | 3.6154 |
| 36         | -71.5  | 153.7 | -0.23176 | -0.23 | -0.01 | -0.011 | 0.221         | 0.22246 | 4.3573        | 3.8020 |
| 37         | -68.9  | 180.0 | -0.23595 | -0.24 | -0.01 | -0.011 | 0.2238        | 0.22534 | 4.4576        | 4.0621 |
| 38         | -72.2  | 171.3 | -0.23469 | -0.24 | -0.01 | -0.011 | 0.2225        | 0.22381 | 4.4013        | 4.0340 |
| 43         | -77.4  | 145.6 | -0.22262 | -0.23 | -0.02 | -0.01  | 0.2048        | 0.22288 | 2.9007        | 3.5784 |
| 44         | -90.6  | 141.6 | -0.23173 | -0.23 | -0.01 | -0.011 | 0.222         | 0.22005 | 4.2654        | 3.7963 |
| 45         | -54.5  | 177.4 | -0.23539 | -0.24 | -0.01 | -0.011 | 0.2237        | 0.22511 | 4.3108        | 4.1293 |
| 46         | -69.4  | 176.8 | -0.23446 | -0.23 | -0.01 | -0.011 | 0.223         | 0.22349 | 4.2918        | 4.1071 |

| Thioami       | C=N bond |       | %Vbur |       | %Vbur (with H) |       | C=X bond |       | Chem.Pot |      | Chem.Har |      | Electrophili |      |
|---------------|----------|-------|-------|-------|----------------|-------|----------|-------|----------|------|----------|------|--------------|------|
|               | cis      | trans | cis   | trans | cis            | trans | cis      | trans | cis      | tran | cis      | tran | cis          | tran |
| 1             | 1.355    | 1.351 | 78.6  | 80.0  | 68.7           | 1.678 | 1.677    | -     | ###      | 0.1  | 0.1      | 0.06 | 0.05         |      |
| 2             | 1.351    | 1.348 | 77.7  | 78.9  | 68.2           | 1.679 | 1.676    | -     | ###      | 0.1  | 0.1      | 0.05 | 0.04         |      |
| 3             | 1.353    | 1.354 | 71.8  | 72.0  | 59.7           | 1.687 | 1.686    | -     | ###      | 0.1  | 0.1      | 0.04 | 0.04         |      |
| 4             | 1.350    | 1.352 | 74.2  | 76.3  | 62.3           | 1.682 | 1.679    | -     | ###      | 0.1  | 0.1      | 0.04 | 0.04         |      |
| 5             | 1.363    | 1.358 | 79.9  | 82.3  | 73.2           | 1.684 | 1.684    | -     | ###      | 0.1  | 0.1      | 0.05 | 0.03         |      |
| 6             | 1.349    | 1.350 | 65.3  | 67.7  | 55.4           | 1.680 | 1.679    | -     | ###      | 0.1  | 0.1      | 0.04 | 0.04         |      |
| 13            | 1.343    | 1.339 | 57.8  | 59.1  | 45.9           | 1.662 | 1.662    | -     | ###      | 0.1  | 0.1      | 0.05 | 0.04         |      |
| 14            | 1.332    | 1.333 | 74.1  | 75.0  | 62.7           | 1.644 | 1.642    | -     | ###      | 0.1  | 0.1      | 0.09 | 0.10         |      |
| 15            | 1.388    | 1.376 | 75.1  | 77.2  | 65.5           | 1.694 | 1.693    | -     | ###      | 0.1  | 0.1      | 0.04 | 0.03         |      |
| 16            | 1.351    | 1.351 | 67.2  | 68.5  | 55.2           | 1.679 | 1.678    | -     | ###      | 0.1  | 0.1      | 0.04 | 0.03         |      |
| 17            | 1.385    | 1.366 | 81.7  | 84.2  | 74.7           | 1.675 | 1.680    | -     | ###      | 0.1  | 0.1      | 0.06 | 0.05         |      |
| 23            | 1.345    | 1.346 | 74.5  | 75.4  | 64.6           | 1.661 | 1.659    | -     | ###      | 0.1  | 0.1      | 0.07 | 0.07         |      |
| 24            | 1.372    | 1.358 | 90.1  | 90.8  | 83.7           | 1.655 | 1.664    | -     | ###      | 0.1  | 0.1      | 0.09 | 0.07         |      |
| 25            | 1.368    | 1.362 | 87.3  | 89.0  | 76.9           | 1.681 | 1.681    | -     | ###      | 0.1  | 0.1      | 0.05 | 0.04         |      |
| 26            | 1.359    | 1.358 | 62.5  | 64.8  | 52.0           | 1.699 | 1.697    | -     | ###      | 0.1  | 0.1      | 0.04 | 0.03         |      |
| 31            | 1.390    | 1.370 | 81.5  | 84.7  | 76.7           | 1.674 | 1.679    | -     | ###      | 0.1  | 0.1      | 0.06 | 0.05         |      |
| 32            | 1.372    | 1.366 | 78.8  | 81.7  | 71.8           | 1.685 | 1.680    | -     | ###      | 0.1  | 0.1      | 0.04 | 0.04         |      |
| 33            | 1.356    | 1.356 | 79.1  | 81.9  | 76.0           | 1.694 | 1.688    | -     | ###      | 0.1  | 0.1      | 0.03 | 0.04         |      |
| 34            | 1.354    | 1.354 | 74.1  | 77.2  | 70.7           | 1.688 | 1.685    | -     | ###      | 0.1  | 0.1      | 0.03 | 0.04         |      |
| 39            | 1.403    | 1.382 | 82.5  | 85.8  | 80.2           | 1.665 | 1.678    | -     | ###      | 0.1  | 0.1      | 0.06 | 0.05         |      |
| 40            | 1.365    | 1.366 | 81.1  | 84.3  | 77.5           | 1.697 | 1.683    | -     | ###      | 0.1  | 0.1      | 0.03 | 0.04         |      |
| 41            | 1.359    | 1.356 | 80.2  | 83.0  | 80.4           | 1.694 | 1.690    | -     | ###      | 0.1  | 0.1      | 0.03 | 0.03         |      |
| 42            | 1.356    | 1.356 | 75.0  | 78.0  | 77.7           | 1.689 | 1.690    | -     | ###      | 0.1  | 0.1      | 0.03 | 0.03         |      |
| <u>Amides</u> |          |       |       |       |                |       |          |       |          |      |          |      |              |      |
| 7             | 1.378    | 1.375 | 76.2  | 77.5  | 66.8           | 1.228 | 1.226    | -     | ###      | 0.1  | 0.2      | 0.05 | 0.04         |      |
| 8             | 1.376    | 1.373 | 74.8  | 76.5  | 65.5           | 1.228 | 1.227    | -     | ###      | 0.2  | 0.2      | 0.04 | 0.04         |      |
| 9             | 1.376    | 1.381 | 69.3  | 70.8  | 58.5           | 1.229 | 1.227    | -     | ###      | 0.2  | 0.2      | 0.04 | 0.03         |      |
| 10            | 1.371    | 1.377 | 72.8  | 75.0  | 64.4           | 1.228 | 1.226    | -     | ###      | 0.2  | 0.2      | 0.04 | 0.03         |      |
| 11            | 1.378    | 1.380 | 79.0  | 81.4  | 72.3           | 1.229 | 1.226    | -     | ###      | 0.2  | 0.2      | 0.04 | 0.03         |      |
| 12            | 1.374    | 1.382 | 64.4  | 66.7  | 54.2           | 1.227 | 1.224    | -     | ###      | 0.2  | 0.2      | 0.04 | 0.03         |      |
| 18            | 1.358    | 1.371 | 57.3  | 58.9  | 44.3           | 1.222 | 1.217    | -     | ###      | 0.2  | 0.2      | 0.04 | 0.04         |      |
| 19            | 1.336    | 1.342 | 73.2  | 74.1  | 61.4           | 1.202 | 1.224    | -     | ###      | 0.1  | 0.1      | 0.09 | 0.09         |      |
| 20            | 1.403    | 1.420 | 73.5  | 75.4  | 64.1           | 1.230 | 1.224    | -     | ###      | 0.2  | 0.1      | 0.03 | 0.03         |      |
| 21            | 1.363    | 1.373 | 65.9  | 67.1  | 53.8           | 1.219 | 1.216    | -     | ###      | 0.2  | 0.2      | 0.04 | 0.03         |      |
| 22            | 1.402    | 1.382 | 79.2  | 82.4  | 73.3           | 1.224 | 1.227    | -     | ###      | 0.2  | 0.2      | 0.03 | 0.03         |      |
| 27            | 1.354    | 1.359 | 73.9  | 74.8  | 61.0           | 1.217 | 1.215    | -     | ###      | 0.2  | 0.2      | 0.05 | 0.05         |      |
| 28            | 1.368    | 1.361 | 88.9  | 89.6  | 82.7           | 1.214 | 1.214    | -     | ###      | 0.2  | 0.2      | 0.05 | 0.04         |      |
| 29            | 1.383    | 1.385 | 85.7  | 87.4  | 75.5           | 1.222 | 1.220    | -     | ###      | 0.1  | 0.1      | 0.04 | 0.04         |      |
| 30            | 1.385    | 1.366 | 60.7  | 61.9  | 50.9           | 1.228 | 1.225    | -     | ###      | 0.2  | 0.2      | 0.04 | 0.03         |      |
| 35            | 1.406    | 1.383 | 80.0  | 83.3  | 75.2           | 1.224 | 1.227    | -     | ###      | 0.2  | 0.2      | 0.03 | 0.03         |      |
| 36            | 1.385    | 1.380 | 77.8  | 81.1  | 75.2           | 1.233 | 1.228    | -     | ###      | 0.2  | 0.2      | 0.03 | 0.03         |      |
| 37            | 1.373    | 1.372 | 77.3  | 80.3  | 74.7           | 1.233 | 1.232    | -     | ###      | 0.2  | 0.2      | 0.03 | 0.03         |      |
| 38            | 1.373    | 1.371 | 72.0  | 75.1  | 69.0           | 1.231 | 1.231    | -     | ###      | 0.2  | 0.2      | 0.03 | 0.03         |      |
| 43            | 1.420    | 1.389 | 80.8  | 84.1  | 79.3           | 1.220 | 1.228    | -     | ###      | 0.2  | 0.2      | 0.03 | 0.03         |      |
| 44            | 1.384    | 1.385 | 78.9  | 82.2  | 79.0           | 1.234 | 1.227    | -     | ###      | 0.2  | 0.2      | 0.03 | 0.03         |      |
| 45            | 1.375    | 1.373 | 78.3  | 81.3  | 78.9           | 1.232 | 1.232    | -     | ###      | 0.2  | 0.2      | 0.03 | 0.03         |      |
| 46            | 1.373    | 1.371 | 72.8  | 75.9  | 74.4           | 1.232 | 1.231    | -     | ###      | 0.2  | 0.2      | 0.03 | 0.03         |      |

| Thioamides | NBO charge cis |        |        | NBO charge trans |        |        | %V <sub>Bur</sub> <sup>1</sup> | %V <sub>bur</sub> | %V <sub>bur</sub> <sup>2</sup> |
|------------|----------------|--------|--------|------------------|--------|--------|--------------------------------|-------------------|--------------------------------|
|            | N              | S      | C      | N                | S      | C      | ts                             | cis               | cis                            |
| 1          | -0.466         | -0.193 | 0.140  | -0.473           | -0.187 | 0.144  | 70.1                           | 78.5              | 62.9                           |
| 2          | -0.467         | -0.204 | 0.134  | -0.474           | -0.194 | 0.136  | 65.2                           | 77.1              | 61.5                           |
| 3          | -0.475         | -0.265 | 0.166  | -0.482           | -0.247 | 0.164  | 60.3                           | 70.6              | 55.3                           |
| 4          | -0.481         | -0.245 | 0.180  | -0.490           | -0.219 | 0.174  | 65.0                           | 74.2              | 59.1                           |
| 5          | -0.496         | -0.212 | 0.179  | -0.495           | -0.203 | 0.176  | 72.7                           | 80.3              | 64.8                           |
| 6          | -0.481         | -0.240 | 0.155  | -0.487           | -0.224 | 0.154  | 54.0                           | 65.4              | 49.6                           |
| 13         | -0.444         | -0.213 | -0.039 | -0.462           | -0.217 | -0.028 | 51.8                           | 58.5              | 34.2                           |
| 14         | -0.459         | -0.075 | 0.212  | -0.467           | -0.057 | 0.209  | 64.0                           | 74.0              | 57.3                           |
| 15         | -0.535         | -0.288 | 0.311  | -0.530           | -0.281 | 0.334  | 64.9                           | 75.7              | 58.6                           |
| 16         | -0.500         | -0.288 | 0.451  | -0.503           | -0.275 | 0.448  | 55.6                           | 67.5              | 50.9                           |
| 17         | -0.566         | -0.149 | 0.189  | -0.528           | -0.190 | 0.187  | 74.5                           | 82.5              | 65.6                           |
| 23         | -0.448         | -0.117 | 0.024  | -0.455           | -0.098 | 0.019  | 65.8                           | 74.6              | 59.1                           |
| 24         | -0.501         | -0.015 | 0.083  | -0.479           | -0.061 | 0.090  | 86.7                           | 90.4              | 74.7                           |
| 25         | -0.543         | -0.217 | 0.323  | -0.508           | -0.212 | 0.323  | 84.0                           | 86.4              | 69.6                           |
| 26         | -0.510         | -0.342 | 0.319  | -0.511           | -0.328 | 0.317  | 49.6                           | 62.9              | 45.7                           |
| 31         | -0.574         | -0.141 | 0.201  | -0.537           | -0.181 | 0.196  | 79.4                           | 83.2              | 66.1                           |
| 32         | -0.517         | -0.205 | 0.184  | -0.513           | -0.201 | 0.184  | 69.8                           | 79.7              | 64.3                           |
| 33         | -0.471         | -0.249 | 0.182  | -0.485           | -0.231 | 0.185  | 77.4                           | 79.2              | 64.6                           |
| 34         | -0.472         | -0.248 | 0.181  | -0.483           | -0.236 | 0.181  | 71.9                           | 74.1              | 59.4                           |
| 39         | -0.622         | -0.105 | 0.219  | -0.553           | -0.167 | 0.204  | 82.4                           | 85.4              | 65.7                           |
| 40         | -0.490         | -0.260 | -0.199 | -0.509           | -0.215 | 0.191  | 79.5                           | 81.2              | 65.5                           |
| 41         | -0.485         | -0.247 | 0.191  | -0.488           | -0.240 | 0.188  | 81.0                           | 80.4              | 64.7                           |
| 42         | -0.479         | -0.254 | 0.190  | -0.487           | -0.252 | 0.194  | 72.5                           | 75.0              | 59.4                           |
| <hr/>      |                |        |        |                  |        |        |                                |                   |                                |
| Amides     |                |        |        |                  |        |        |                                |                   |                                |
| 7          | -0.508         | -0.638 | 0.685  | -0.513           | -0.633 | 0.684  | 67.4                           | 76.2              | 61.3                           |
| 8          | -0.509         | -0.642 | 0.676  | -0.512           | -0.639 | 0.674  | 63.9                           | 75.0              | 60.1                           |
| 9          | -0.516         | -0.674 | 0.695  | -0.510           | -0.662 | 0.695  | 58.6                           | 69.5              | 54.8                           |
| 10         | -0.519         | -0.671 | 0.711  | -0.526           | -0.653 | 0.706  | 63.9                           | 73.0              | 58.5                           |
| 11         | -0.525         | -0.660 | 0.716  | -0.528           | -0.648 | 0.713  | 71.2                           | 79.2              | 64.8                           |
| 12         | -0.526         | -0.663 | 0.697  | -0.515           | -0.644 | 0.698  | 52.8                           | 64.4              | 49.4                           |
| 18         | -0.511         | -0.646 | 0.545  | -0.492           | -0.623 | 0.550  | 51.4                           | 57.7              | 34.2                           |
| 19         | -0.494         | -0.578 | 0.797  | -0.491           | -0.565 | 0.801  | 68.7                           | 73.2              | 57.4                           |
| 20         | -0.551         | -0.683 | 0.833  | -0.538           | -0.654 | 0.839  | 64.0                           | 74.0              | 57.9                           |
| 21         | -0.531         | -0.676 | 0.934  | -0.517           | -0.661 | 0.937  | 54.0                           | 66.1              | 50.4                           |
| 22         | -0.575         | -0.635 | 0.740  | -0.538           | -0.660 | 0.724  | 74.0                           | 80.8              | 65.4                           |
| 27         | -0.489         | -0.603 | 0.608  | -0.486           | -0.589 | 0.607  | 64.4                           | 74.0              | 59.2                           |
| 28         | -0.510         | -0.585 | 0.703  | -0.503           | -0.590 | 0.697  | 84.9                           | 88.9              | 74.7                           |
| 29         | -0.531         | -0.646 | 0.843  | -0.518           | -0.637 | 0.843  | 82.6                           | 85.4              | 70.2                           |
| 30         | -0.533         | -0.691 | 0.812  | -0.530           | -0.682 | 0.811  | 48.5                           | 61.0              | 44.9                           |
| 35         | -0.629         | -0.579 | 0.748  | -0.537           | -0.656 | 0.728  | 77.0                           | 81.3              | 65.7                           |
| 36         | -0.527         | -0.676 | 0.717  | -0.534           | -0.664 | 0.724  | 73.4                           | 78.1              | 64.3                           |
| 37         | -0.505         | -0.671 | 0.709  | -0.511           | -0.511 | 0.710  | 74.8                           | 77.5              | 63.5                           |
| 38         | -0.510         | -0.671 | 0.710  | -0.516           | -0.676 | 0.713  | 68.9                           | 72.2              | 58.3                           |
| 43         | -0.615         | -0.618 | 0.776  | -0.538           | -0.662 | 0.732  | 79.8                           | 83.2              | 65.4                           |
| 44         | -0.528         | -0.682 | 0.719  | -0.558           | -0.656 | 0.732  | 77.0                           | 79.1              | 64.2                           |
| 45         | -0.514         | -0.674 | 0.715  | -0.515           | -0.674 | 0.713  | 75.9                           | 78.6              | 63.6                           |
| 46         | -0.515         | -0.678 | 0.714  | -0.520           | -0.679 | 0.717  | 70.7                           | 73.0              | 58.2                           |

<sup>1</sup> calculated with a dummy atom, not with the central point among groups in *cis*; <sup>2</sup> for only the groups in *cis*, the rest is removed.



For  $\Delta G_{trans}$  for all the molecules (n=46)

$R^2$  for 1, 2, ..., 6 descriptors are 0.6789, 0.7284, 0.7582, 0.7979, 0.8186, 0.8425

In those MLR models there is some uniformity, and the involved variables are some (or all) of the following ones:

$\% \tau_{cis}$        $\%XC_{cis}$        $XN_{trans}$        $\%XN_{cis}$        $qNBO-C_{cis}$        $qNBO-C_{trans}$

In order to seek for a more predictive linear model, we also searched for equations giving the highest  $R^2$  value for leave-one-out cross-validation (*i.e.* simulating the extraction of one molecule and predicting the experimental value with the equation obtained with the other molecules). In this case, the so-called  $R^2_{CV}$  values are

$R^2_{CV}$  for 1, 2, ..., 7 descriptors are 0.6474, 0.6899, 0.6896, 0.7306, 0.7492, 0.7241, 0.7473

The variables involved in these models are more or less the same ones indicated above. Actually, when the variables coincide along  $R^2$  and  $R^2_{CV}$  optimized models, the final MLR model is the same.

For  $\Delta G_{TS}$  for all the molecules (n=46)

When modeling the property  $\Delta G_{TS}$ , correlations are a little bit better, confirming a major role for kinetics than thermodynamics:

$R^2$  for 1, 2, ..., 6 descriptors are 0.7272, 0.8410, 0.8688, 0.8914, 0.9037, 0.9079

But here, the variables appearing in the MLR are more unstable (change more from model to model involving a different number of descriptors). Some of the variables used more times are:

$\%XC_{cis}$        $XN_{trans}$        $C=N-BL_{cis}$        $qNBO-S_{trans}$        $qNBO-C_{trans}$

When optimizing for  $R^2_{CV}$  we obtain:

$R^2_{CV}$  for 1, 2, ..., 7 descriptors: 0.7053, 0.8121, 0.8355, 0.8546, 0.8674, 0.8689, 0.8822

The descriptors involved in these models use to be the following ones:

$\%XC_{cis}$        $XN_{trans}$        $C=N-BL_{cis}$        $qNBO-S_{trans}$        $qNBO-C_{trans}$

Calculations involving only 23 molecules (thioamides or amides, only)

For  $\Delta G_{TS}$ , the equations involving only the thioamides (n=23) increase the  $R^2_{CV}$  values, reaching up to 0.95 or more:

$R^2_{CV}$  (Thio only): 0.7859, 0.8286, 0.8801, 0.9097, 0.9514, 0.9569, 0.9648

In this case, the variables  $\% \tau_{trans}$ ,  $XC_{trans}$  and C=X bond length<sub>cis</sub> are used several times along the models.

For  $\Delta G_{trans}$ , the equations involving only the Amides (n=23) the  $R^2_{CV}$  values are:

$R^2_{CV}$  (Amides only): 0.6735, 0.7018, 0.8168, 0.8638, 0.9043, 0.9012, 0.9213

### PLS calculations

After the focus on the linear models described above, to reproduce the property ( $\Delta G_{trans}$  or  $\Delta G_{TS}$ ) with a small linear model involving only a few descriptors, and (if possible) being interpretable, we have also played with the linear technique called PLS, Partial Least Squares ([https://dogedaos.com/wiki/Partial\\_least\\_squares\\_regression.html](https://dogedaos.com/wiki/Partial_least_squares_regression.html)) which is a procedure similar to a diagonalization of the matrix  $X$  containing *all* the descriptors and, at the same time trying to correlate with a property. So, instead of eigenvectors (which are related only to the  $X$  matrix of descriptors) one seeks for the so-called Latent Variables (LV), which are similar to eigenvectors, but focused (correlated) towards a property. In PLS the final linear model involves *all* the variables. For instance, for  $\Delta G_{TS}$  (the best case) and for all the 46 molecules, the fitted vs experimental values give Figure S5 (n=46, 48 variables, R=0.950,  $R^2=0.903$ ):

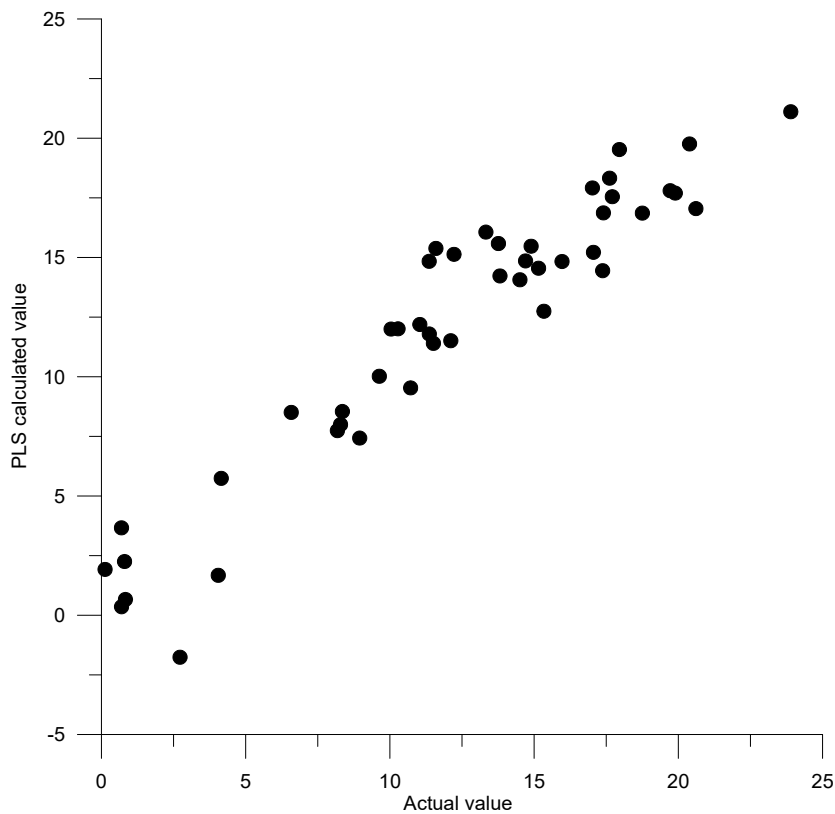

**Figure S5.** 5 LVs, fitting with PLS,  $R=0.950$ ,  $R^2=0.903$

PLS calculations can be useful to obtain the coefficients attached to all the variables, like in Figure S6, where we have been able to screen/study which variables are more contributive, or which ones have a positive or a negative coefficient.

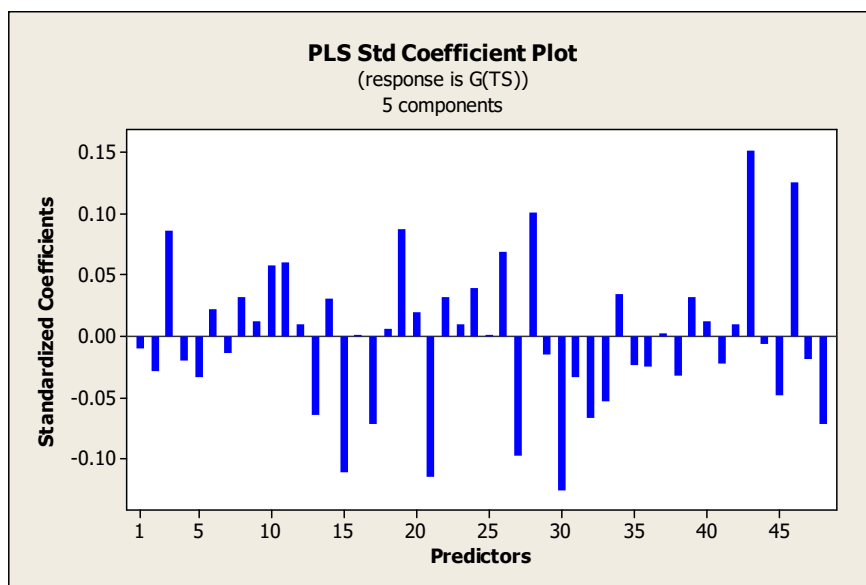

**Figure S6.** PLS standard coefficient plot (5 LV, GTS)

---

<sup>i</sup> Gaussian 16, Revision C.01, Frisch, M. J.; Trucks, G. W.; Schlegel, H. B.; Scuseria, G. E.; Robb, M. A.; Cheeseman, J. R.; Scalmani, G.; Barone, V.; Petersson, G. A.; Nakatsuji, H.; Li, X.; Caricato, M.; Marenich, A. V.; Bloino, J.; Janesko, B. G.; Gomperts, R.; Mennucci, B.; Hratchian, H. P.; Ortiz, J. V.; Izmaylov, A. F.; Sonnenberg, J. L.; Williams-Young, D.; Ding, F.; Lipparini, F.; Egidi, F.; Goings, J.; Peng, B.; Petrone, A.; Henderson, T.; Ranasinghe, D.; Zakrzewski, V. G.; Gao, J.; Rega, N.; Zheng, G.; Liang, W.; Hada, M.; Ehara, M.; Toyota, K.; Fukuda, R.; Hasegawa, J.; Ishida, M.; Nakajima, T.; Honda, Y.; Kitao, O.; Nakai, H.; Vreven, T.; Throssell, K.; Montgomery, J. A., Jr.; Peralta, J. E.; Ogliaro, F.; Bearpark, M. J.; Heyd, J. J.; Brothers, E. N.; Kudin, K. N.; Staroverov, V. N.; Keith, T. A.; Kobayashi, R.; Normand, J.; Raghavachari, K.; Rendell, A. P.; Burant, J. C.; Iyengar, S. S.; Tomasi, J.; Cossi, M.; Millam, J. M.; Klene, M.; Adamo, C.; Cammi, R.; Ochterski, J. W.; Martin, R. L.; Morokuma, K.; Farkas, O.; Foresman, J. B.; Fox, D. J. Gaussian, Inc., Wallingford CT, 2016.

<sup>ii</sup> (a) Becke, A. D. Density-functional thermochemistry. The role of exact exchange. *J. Chem. Phys.* **1993**, *98*, 5648–5652. (b) Lee, C. T.; Yang, W. T.; Parr, R. G. Development of the Colle-Salvetti Correlation-Energy Formula into a Functional of the Electron Density. *Physical Review. Phys. Rev. B* **1988**, *37*, 785–789. (c) Stephens, P. J.; Devlin, F. J.; Chabalowski, C. F.; Frisch, M. J. Ab initio calculation of vibrational absorption and circular dichroism spectra using density functional force fields. *J. Phys. Chem.* **1994**, *98*, 11623–11627.

<sup>iii</sup> Ditchfield, R.; Hehre, W. J.; Pople, J. A. Self-Consistent Molecular-Orbital Methods. IX. An Extended Gaussian-Type Basis for Molecular-Orbital Studies of Organic Molecules. *J. Chem. Phys.* **1971**, *54*, 724–728.

<sup>iv</sup> Grimme, S.; Antony, J.; Ehrlich, S.; Krieg, H. A Consistent and Accurate Ab Initio Parametrization of Density Functional Dispersion Correction (DFT-D) for the 94 Elements H-Pu. *J. Chem. Phys.* **2010**, *132*, 154104.

<sup>v</sup> (a) Barone, V.; Cossi, M. Quantum Calculation of Molecular Energies and Energy Gradients in Solution by a Conductor Solvent Model. *J. Phys. Chem. A* **1988**, *102*, 1995–2001. (b) Tomasi, J.; Persico, M. Molecular Interactions in Solution: An Overview of Methods Based on Continuous Distributions of the Solvent. *Chem. Rev.* **1994**, *94*, 2027–2094.
